# Supplementary material for: Nitrogen and Phosphorous Retention in Tropical Eutrophic Reservoirs with Water Level Fluctuations: A Case Study Using Mass Balances on a Long-Term Series
Source: MDPI journal article supplement (doi:10.3390/w14142144), 2022-07-06
Supplement: s1 [file s1]

Archive with 1 entries (1 files):
- water-1746894-supplementary.pdf
