# Supplementary material for: Nitrogen and Phosphorous Retention in Tropical Eutrophic Reservoirs with Water Level Fluctuations: A Case Study Using Mass Balances on a Long-Term Series
Source: MDPI journal article supplement (doi:10.3390/w14142144), 2022-07-06
Supplement: s1 [file s1 › water-1746894-supplementary.pdf]

## Supplementary Materials

**Maríel Barjau-Aguilar et al \_ Nitrogen and phosphorous mass balances show tropical eutrophic reservoirs behave as variable but persistent sinks of both elements: a case study using a long-term series to assess the effect of water level fluctuations**

**Table S1.** Water Budget of Valle de Bravo reservoir. Mean, maximum and minimum daily water level and mean annual water budget components of Valle de Bravo during: the low water level fluctuations-1 (L-WLF-1) years (2002-2005), the high-water level fluctuations (H-WLF) years (2006-2013) –for better visualization shaded in purple–, the, water level fluctuations-2 (L-WLF-2) years (2014-2018), the overall mean (2003-2018) and the overall percentage of each inflow and outflow regarding the overall total inflows.

|                                                                       | L-LWF-1<br>(2003-2005) | H-LWF<br>(2006-2013) | L-LWF-2<br>(2014-2018) | Overall<br>(2003-2018) |                |
|-----------------------------------------------------------------------|------------------------|----------------------|------------------------|------------------------|----------------|
| <b>Reservoir</b>                                                      |                        |                      |                        |                        |                |
| Water level ( m a.s.l)                                                | 1827.0                 | 1824.0               | 1827.8                 | 1825.7                 |                |
| Min                                                                   | 1826.4                 | 1821.4               | 1826.5                 | 1821.4                 |                |
| Max                                                                   | 1827.5                 | 1827.0               | 1828.6                 | 1828.6                 |                |
| Surface area (10 <sup>6</sup> m <sup>2</sup> )                        | 16.8                   | 15.5                 | 17.7                   | 16.4                   |                |
| Volume (10 <sup>6</sup> m <sup>3</sup> )                              | 342.2                  | 290.2                | 353.0                  | 319.6                  |                |
| $\Delta V/\Delta t$ (10 <sup>6</sup> m <sup>3</sup> y <sup>-1</sup> ) | -23.1                  | 7.2                  | 8.8                    | 2.0                    |                |
| <b>Water Flows (10<sup>6</sup>m<sup>3</sup>y<sup>-1</sup>)</b>        |                        |                      |                        |                        | <b>% Input</b> |
| <b>Inflows</b>                                                        | <b>221.6</b>           | <b>199.5</b>         | <b>231.1</b>           | <b>213.5</b>           | <b>100%</b>    |
| Precipitation                                                         | 16.2                   | 17.3                 | 19.7                   | 17.8                   | 8%             |
| Pump-back                                                             | 8.5                    | 20.3                 | 16.6                   | 16.9                   | 8%             |
| Rivers and sewages                                                    | 196.9                  | 162.0                | 194.8                  | 178.8                  | 84%            |
| - <b>Rivers</b>                                                       | 189.4                  | 153.9                | 185.9                  | 170.5                  | 80%            |
| - Amanalco River                                                      | 87.8                   | 86.7                 | 106.0                  | 92.9                   | 80%            |
| - Molino River                                                        | 72.1                   | 41.8                 | 36.3                   | 45.8                   | 44%            |
| - Gonzales River                                                      | 14.5                   | 12.8                 | 17.2                   | 14.5                   | 21%            |
| - Carrizal River                                                      | 11.8                   | 7.5                  | 20.0                   | 12.2                   | 7%             |
| - Santa Monica River                                                  | 3.2                    | 5.0                  | 6.4                    | 5.1                    | 2%             |
| - <b>Sewages</b>                                                      | 7.5                    | 8.1                  | 8.9                    | 8.2                    | 4%             |
| - Tizates                                                             | 5.3                    | 4.2                  | 5.7                    | 4.9                    | 2%             |
| - Embarcadero I                                                       | 1.1                    | 2.7                  | 2.4                    | 2.3                    | 1%             |
| - Embarcadero II                                                      | 1.1                    | 1.2                  | 0.8                    | 1.1                    | 0%             |
| <b>Outflows</b>                                                       | <b>-243.0</b>          | <b>-191.9</b>        | <b>-221.1</b>          | <b>-210.6</b>          | <b>-99%</b>    |
| Evaporation                                                           | -30.4                  | -28.4                | -28.5                  | -28.8                  | -13%           |
| Water Withdrawal                                                      | -212.6                 | -163.5               | -192.6                 | -181.8                 | -85%           |
| <b>Inflows-Outflows</b>                                               | <b>-21.4</b>           | <b>7.6</b>           | <b>10.0</b>            | <b>2.9</b>             | <b>1%</b>      |
